# Supplementary material
Source: PubMed Central journal article supplement (PMC5354127)

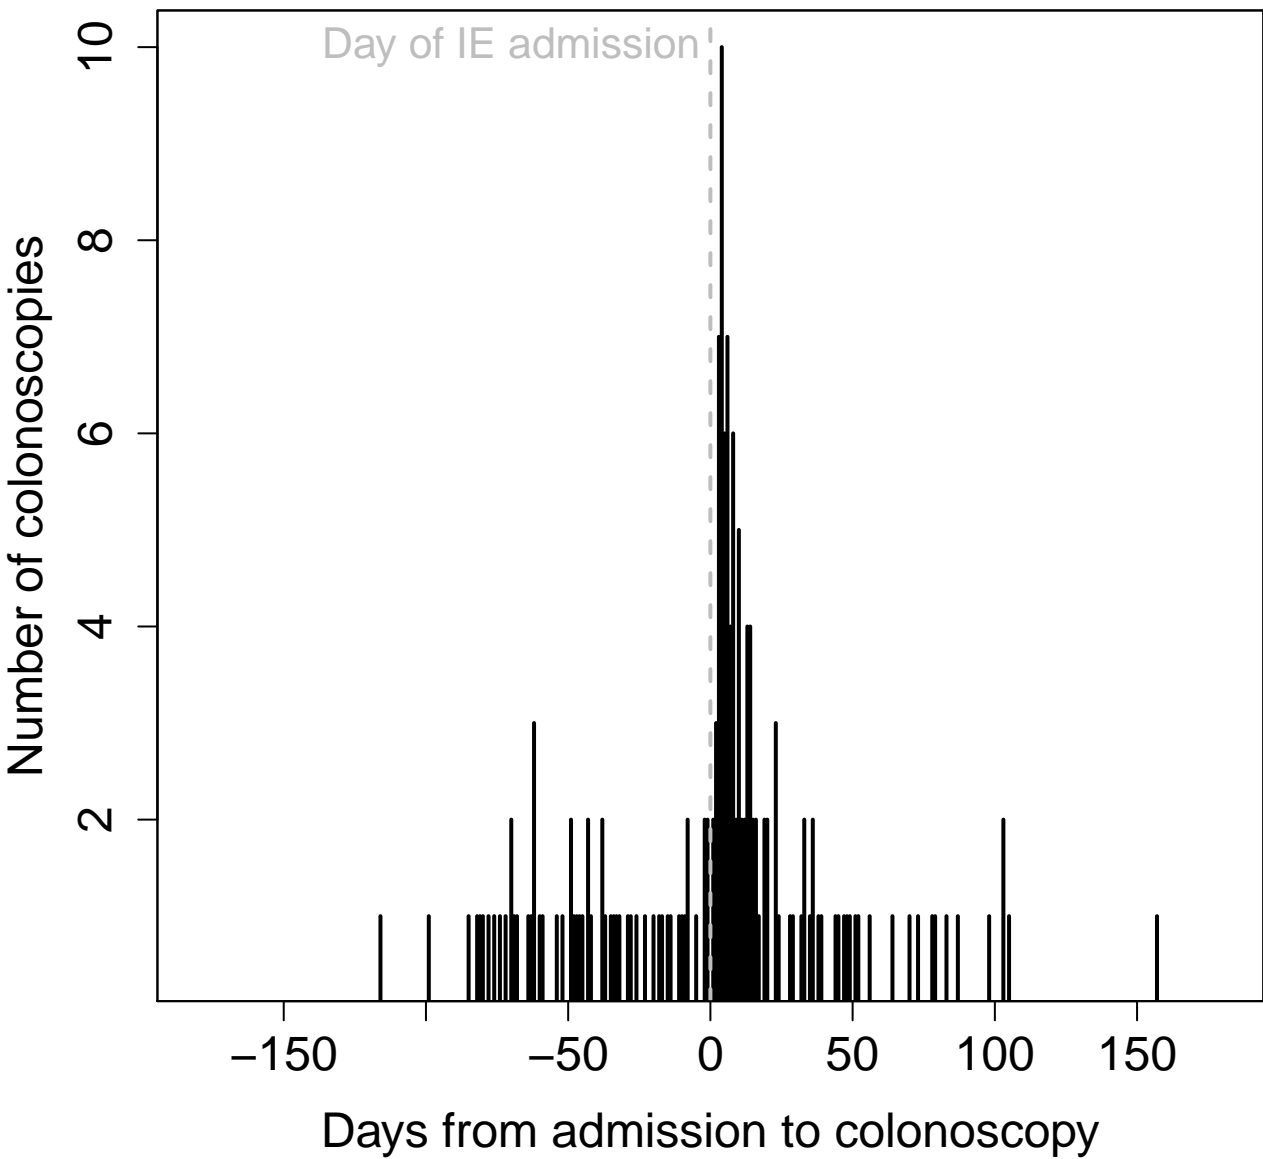

Supplement: NIHMS845652-supplement-Supplemental_Figure_A1.pdf [file NIHMS845652-supplement-Supplemental_Figure_A1.pdf]
